# Supplementary material for: A hierarchical surrogate approach to biomass ethanolysis reaction kinetic modelling
Source: Royal Society of Chemistry journal article supplement (doi:10.1039/d4re00378k), 2024-11-13
Supplement: d4re00378k1.pdf [file d4re00378k1.pdf]

## Supplemental Information:

### A Hierarchical Surrogate Approach to Biomass Ethanolysis Reaction Kinetic Modelling

#### S1. Biochemical Composition of Corncob Data

##### S1.1 Aldoses

|                                  | Glucan       | Xylan        | Arabinan    | Galactan    | Mannan      | Rhamnan     |
|----------------------------------|--------------|--------------|-------------|-------------|-------------|-------------|
| Wet-Chemical Data (% Dry Matter) |              |              |             |             |             |             |
| Average                          | <b>29.68</b> | <b>24.19</b> | <b>2.11</b> | <b>0.53</b> | <b>0.08</b> | <b>0.04</b> |
| Repeat 1                         | 29.81        | 24.27        | 2.12        | 0.53        | 0.08        | 0.04        |
| Repeat 2                         | 29.56        | 24.11        | 2.10        | 0.53        | 0.08        | 0.04        |
| Std. Dev.                        | 0.17         | 0.11         | 0.01        | 0.00        | 0.00        | 0.00        |

##### S1.2 Total Sugars and Sugar Classes

|                                  | Hexosans     | Pentosans    | Total Sugars |
|----------------------------------|--------------|--------------|--------------|
| Wet-Chemical Data (% Dry Matter) |              |              |              |
| <b>Average</b>                   | <b>30.33</b> | <b>26.30</b> | <b>56.63</b> |
| Rep 1                            | 30.45        | 26.39        | 56.84        |
| Rep 2                            | 30.21        | 26.21        | 56.42        |
| Std. Dev.                        | 0.17         | 0.12         | 0.29         |

##### S1.3 Lignin Content

|                                  | Klason Lignin | Acid Soluble Lignin | Acid Insoluble Residue |
|----------------------------------|---------------|---------------------|------------------------|
| Wet-Chemical Data (% Dry Matter) |               |                     |                        |
| <b>Average</b>                   | <b>8.63</b>   | <b>3.09</b>         | <b>9.00</b>            |
| Rep 1                            | 8.62          | 3.23                | 8.91                   |
| Rep 2                            | 8.64          | 2.96                | 9.09                   |
| Std. Dev.                        | 0.02          | 0.19                | 0.12                   |

##### S1.4 Ash and Extractives

|                                  | Ash         | Acid Insoluble Ash | Full Extr.   | Water Soluble Extr. | Ethanol Soluble Extr. | Water Insoluble, Ethanol Soluble Extr. |
|----------------------------------|-------------|--------------------|--------------|---------------------|-----------------------|----------------------------------------|
| Wet-Chemical Data (% Dry Matter) |             |                    |              |                     |                       |                                        |
| <b>Average</b>                   | <b>3.08</b> | <b>0.37</b>        | <b>23.44</b> | <b>21.55</b>        | <b>7.63</b>           | <b>1.89</b>                            |
| Rep 1                            | 3.34        | 0.30               | 23.72        | 21.85               | 7.54                  | 1.87                                   |
| Rep 2                            | 2.82        | 0.44               | 23.16        | 21.26               | 7.72                  | 1.91                                   |
| Std. Dev.                        | 0.37        | 0.10               | 0.40         | 0.42                | 0.13                  | 0.03                                   |

##### S1.5 Sugars in Water Extract

|                            | Glucose      | Fructose     | Mannose | Galactose    | Rhamnose |
|----------------------------|--------------|--------------|---------|--------------|----------|
| Free Sugars (% Dry Matter) |              |              |         |              |          |
| <b>Average</b>             | <b>0.075</b> | <b>0.032</b> | -       | <b>0.028</b> | -        |

|           |       |       |   |       |   |
|-----------|-------|-------|---|-------|---|
| Rep 1     | 0.076 | 0.027 | - | 0.030 | - |
| Rep 2     | 0.074 | 0.037 | - | 0.025 | - |
| Std. Dev. | 0.002 | 0.007 | - | 0.004 | - |

### S1.6 Total Lignocellulosic Composition

|                                                                     | Cellulose    | Hemicellulose | Lignin       | Total Lignocellulose |
|---------------------------------------------------------------------|--------------|---------------|--------------|----------------------|
| Wet-Chemical Data (% Dry Matter)                                    |              |               |              |                      |
| <b>Average</b>                                                      | <b>29.68</b> | <b>26.95</b>  | <b>11.72</b> | <b>68.35</b>         |
| Rep 1                                                               | 29.81        | 27.16         | 11.71        | 68.68                |
| Rep 2                                                               | 29.56        | 26.74         | 11.73        | 68.03                |
| Std. Dev.                                                           | 0.17         | 0.30          | 0.01         | 0.46                 |
| Adjusted Cellulosic Content for D3 RINS (% Dry Mass Ash-Free Basis) |              |               |              |                      |
| <b>Average</b>                                                      | <b>30.62</b> | <b>27.81</b>  | <b>12.09</b> | <b>70.52</b>         |
| Rep 1                                                               | 30.76        | 28.02         | 12.08        | 70.86                |
| Rep 2                                                               | 30.50        | 27.59         | 12.10        | 70.19                |
| Std. Dev.                                                           | 0.18         | 0.31          | 0.01         | 0.47                 |

### S2. Calibration Curves for Gas Chromatography

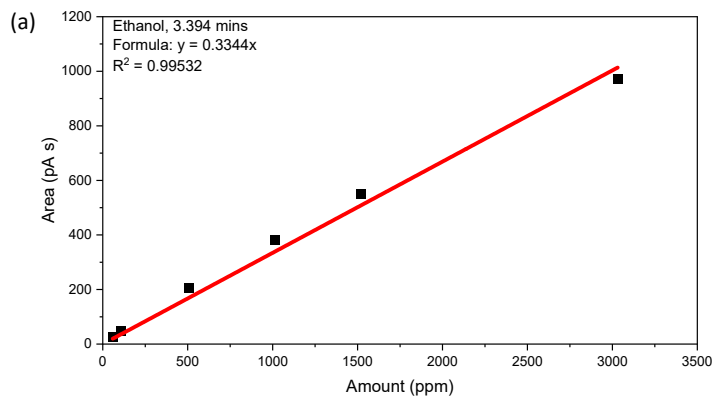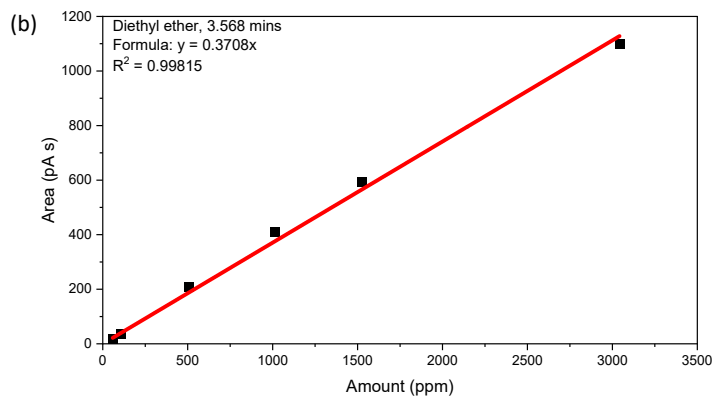

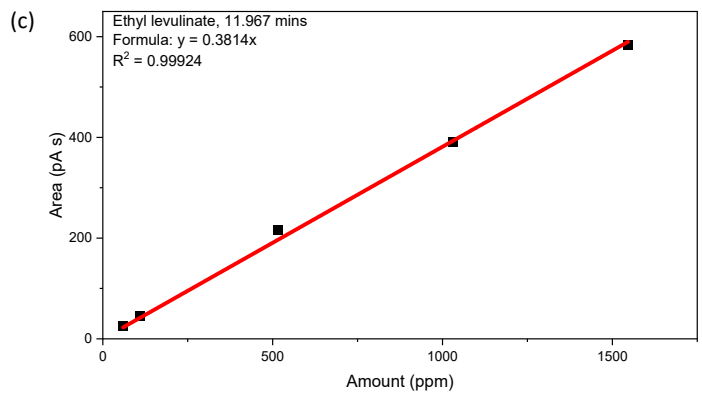

Figure S1. Gas chromatography calibration curve for the major species in the system (a) ethanol, (b) diethyl ether, and (c) ethyl levulinate
